# Supplementary material
Source: publisher figshare collection journal article supplement (https://scielo.figshare.com/articles/dataset/_/7186439)
Supplement: Supplementary file 1 [file Table_1.xls]

## Sheet: Table_1
<b>Relationship between actors</b>
From / to	Type of exchange
Hatchery → Farmer	Day-old chick (10ˆ3 ton)
Hatchery → Government	Tax (million US$)
Farmer → Processing plant	Chicken meat (10ˆ3 ton)
Farmer → Hatchery	Payment (million US$)
Farmer → Government	Tax (million US$)
Farmer → Feed mill	Payment (million US$)
Feed mill → Farmer	Feed (10ˆ3 ton)
Feed mill → Government	Tax (million US$)
Processing plant → Domestic market	Chicken meat (10ˆ3 ton)
Processing plant → Export market	Chicken meat (10ˆ3 ton)
Processing plant → Farmer	Payment (million US$)
Processing plant → Government	Tax (million US$)
Domestic market → Processing plant	Payment (million US$)
Export market → Processing plant	Payment (million US$)
Government → Hatchery	Biosecurity / infrastructure
Government → Farmer	Biosecurity / infrastructure
Government → Feed mill	Biosecurity / infrastructure
Government → Processing plant	Biosecurity / infrastructure
