# Supplementary material
Source: publisher figshare collection journal article supplement (https://scielo.figshare.com/articles/dataset/_/7186439)
Supplement: Supplementary file 2 [file Table_2.xls]

## Sheet: Table_2
<b>Actor and flow of product/payment</b>	<b>Unit</b>	<b>Years</b>
		2000	2001	2002	2003	2004	2005	2006	2007	2008	2009	2010	2011	2012	2013	2014	2015
Export market to Processing plant	Million US$	829	1320	1890	1980	2500	2590	3200	4600	6900	5800	5560	8250	7700	7960	8080	7160
Domestic market to Processing plant	Million US$	3350	3090	3050	3570	3880	4590	4850	7270	8870	8620	11050	13320	15030	16150	18190	26650
Processing plant to Domestic market	10ˆ3 ton	4.96	5.48	5.89	5.88	6.02	6.10	6.62	7.02	7.29	7.35	8.43	8.83	8.55	8.32	8.59	8.89
Processing plant to Export market	10ˆ3 ton	0.94	1.26	1.63	1.96	2.47	2.85	2.72	3.29	3.65	3.66	3.80	3.90	3.90	3.81	4.09	4.30
Hatchery to Farmer	10ˆ3 ton	0.13	0.14	0.15	0.16	0.17	0.19	0.19	0.20	0.22	0.22	0.24	0.25	0.24	0.24	0.25	0.26
Farmer to Hatchery	Million US$	486.42	589.02	522.64	603.14	834.45	1152.34	1041.39	1851.80	2027.38	1613.88	2537.09	2907.96	2203.87	2812.35	2691.32	1888.47
Government to Farmer	Million US$	14.90	13.50	14.63	19.36	24.52	28.94	26.60	46.72	58.98	51.75	62.50	85.49	77.46	80.56	75.92	69.95
Farmer to Government	Million US$	496.82	449.98	487.71	645.33	817.24	964.76	886.72	1557.20	1965.98	1724.99	2083.47	2849.61	2582.15	2685.24	2530.77	2331.63
Farmer to Feed mill	Million US$	3359.16	3398.16	2732.37	2638.33	3386.79	3654.20	4663.44	5899.96	8121.86	7685.66	8420.13	12784.59	12508.85	10906.12	9741.62	5935.04
Feed mill to Farmer	10ˆ3 ton	17.2	18.05	20.12	19.58	21.32	20.60	24.10	25.57	27.63	27.82	30.26	32.20	31.10	30.30	31.30	24.30
Farmer to Processing plant	10ˆ3 ton	5.56	6.22	7.09	7.56	8.63	9.62	9.32	10.80	11.58	11.67	12.45	13.83	13.35	13.03	13.45	13.92
Processing plant to Farmer	Million US$	2760.13	2499.89	2709.52	3585.16	4540.24	5359.77	4926.23	8651.09	10922.10	9583.30	11574.80	15831.16	14345.29	14918	14059.80	12953.50
Processing plant to Government	Million US$	752.22	793.8	889.20	999	1148.40	1292.40	1449	2136.60	2838.60	2595.60	2989.80	3882.60	4091.40	4339.80	4728.60	6085.80
Government to Processing plant	Million US$	22.57	23.81	26.68	29.97	34.45	38.77	43.47	64.10	85.16	77.87	89.69	116.48	122.74	130.19	141.86	182.57
Government to Feed mill	Million US$	18.14	18.35	14.75	14.25	18.29	19.73	25.18	31.86	43.86	41.50	45.47	69.04	67.55	58.89	52.60	32.05
Feed mill to Government	Million US$	604.65	611.67	491.83	474.90	609.62	657.76	839.42	1061.99	1461.93	1383.42	1515.62	2301.23	2251.59	1963.10	1753.49	1068.31
Hatchery to Government	Million US$	87.56	106.02	94.08	108.57	150.20	207.42	187.45	333.32	364.93	290.50	456.68	523.43	396.69	506.22	484.43	339.92
Government to Hatchery	Million US$	2.63	3.18	2.82	3.26	4.51	6.22	5.62	10.00	10.95	8.71	13.70	15.70	11.90	15.19	14.53	10.20
