# Supplementary material
Source: publisher figshare collection journal article supplement (https://scielo.figshare.com/articles/dataset/_/7186439)
Supplement: Supplementary file 3 [file Table_3.xls]

## Sheet: Table_3
<b>Important events</b>
Date	Type of event
2003	Avian influenza
2005	Avian influenza
2006	Avian influenza
2008	Economic crisis
2009	Economic crisis
2010	Merger of Sadia and Perdigão
2010	JBS incorporated Seara and Pilgrim’s
