# Supplementary material
Source: publisher figshare collection journal article supplement (https://scielo.figshare.com/articles/dataset/_/7186439)
Supplement: Supplementary file 4 [file Table_4.xls]

## Sheet: Table_4
<b>Productivity indicators</b>	<b>1960</b>	<b>1970</b>	<b>1980</b>	<b>1990</b>	<b>2000</b>	<b>2010</b>	<b>1960/2010</b>
Feed conversion (quantity of feed to produce 1kg of meat)	2.25	2.15	2.05	2.00	1.88	1.75	-22.20%
Average live weight (kg)	1.60	1.70	1.80	1.94	2.25	2.30	43.80%
Average slaughter age (days)	56	49	48	47	43	41	-26.80%
