# Supplementary material
Source: publisher figshare collection journal article supplement (https://scielo.figshare.com/articles/dataset/_/7186439)
Supplement: Supplementary file 5 [file Table_5.xls]

## Sheet: Table_5
<b>Actor</b>	<b>Year</b>
	2000	2001	2002	2003	2004	2005	2006	2007	2008	2009	2010	2011	2012	2013	2014	2015
Export market	0.03503	0.04272	0.05034	0.04803	0.04952	0.04698	0.05057	0.04919	0.05327	0.05094	0.04566	0.04838	0.04659	0.04655	0.04616	0.04114
Domestic market	0.07652	0.07134	0.06825	0.06945	0.06508	0.06674	0.06565	0.06534	0.06239	0.06531	0.06960	0.06496	0.07055	0.07241	0.07711	0.09473
Processing plant	0.17040	0.17463	0.18249	0.18071	0.17574	0.17438	0.17845	0.17572	0.17751	0.17854	0.17682	0.17353	0.18004	0.18320	0.19075	0.21247
Hatchery	0.04699	0.05103	0.05135	0.05517	0.05835	0.06627	0.05601	0.06576	0.05834	0.05352	0.06449	0.05669	0.04910	0.05811	0.05837	0.05538
Farmer	0.18497	0.17876	0.18535	0.19514	0.19634	0.19770	0.18745	0.19646	0.19413	0.19237	0.19390	0.19355	0.18933	0.19115	0.18796	0.18223
Government	0.28819	0.28927	0.28433	0.28240	0.28363	0.28429	0.28553	0.28482	0.28505	0.28503	0.28520	0.28645	0.28589	0.28487	0.28450	0.28590
Feed mill	0.19790	0.19224	0.17789	0.16910	0.17132	0.16364	0.17632	0.16271	0.16931	0.17429	0.16433	0.17644	0.17850	0.16370	0.15515	0.12815
